# Supplementary material
Source: Research Square preprint supplement (doi:10.21203/rs.3.rs-9598450/v1)
Supplement: Supplementary file 1 [file 128ad5aa0e32b122f3973dc2.docx]

**Table 1. Characteristics of Included Studies (n=30)**

| Author (Year) | Sample Size | Study Design | Main Outcomes |
| --- | --- | --- | --- |
| McNaugher et al. (2001) | 51 | Cross-sectional | Expressed need and satisfaction |
| Dirik et al. (2006) | 158 | Cross-sectional | Anxiety and depression correlates |
| John et al. (2007) | 1180 | Population-based | Depression as risk factor |
| Chamberlain et al. (1985) | 120 | Observational | Depression in prosthodontics |
| Vervoorn et al. (1989) | 107 | Prospective | Dental anxiety assessment |
| Satishkumar et al. (2021) | 207 | Cross-sectional | Chewing ability and depression |
| Sendi et al. (2018) | 58 | Cross-sectional | Health state utilities |
| Singh et al. (2015) | 10,902 | Cross-sectional | Oral health in elderly |
| Pasad et al. (2021) | 66 | Clinical study | Anxiety evaluation |
| Bansod et al. (2024) | 100 | Clinical study | Salivary cortisol and anxiety |
| Shrivastava et al. (2012) | 125 | Cross-sectional | Dental anxiety correlation |
| Weyant et al. (2004) | 249 | Observational | Cognitive correlates |
| Adam et al. (2007) | 76 | Longitudinal | Impact on OHRQoL |
| Thalib et al. (2017) | 6 | Clinical study | Memory and depression |
| Hatim et al. (2008) | 100 | Comparative | Mental health assessment |
| Goiato et al. (2019) | 32 | Clinical study | Cortisol and anxiety response |
| Shigli et al. (2010) | 32 | Clinical study | OHRQoL changes (GOHAI) |
| Pisani et al. (2012) | 15 | Clinical study | OHRQoL after relining |
| Banerjee et al. (2018) | 200 | Longitudinal | Nutritional status and OHRQoL |
| Alves et al. (2018) | 52 | Longitudinal | Quality of life |
| Inoue et al. (2011) | 171 | Observational | Denture quality effect |
| Kuo et al. (2009) | 35 | Longitudinal | HRQoL and prosthetic status |
| Sekundo et al. (2021) | 55 | Cross-sectional | OHRQoL in centenarians |
| Heydecke et al. (2004) | 249 | Observational | OHRQoL and coping styles |
| John et al. (2004) | 60 | Clinical trial | OHRQoL with dentures |
| Heydecke et al. (2003) | 60 | Clinical trial | HRQoL with implant dentures |
| Ellis et al. (2007) | 70 | Clinical study | Rehabilitation impact |
| Stober et al. (2012) | 15 | Longitudinal | Satisfaction and OHRQoL |
| Bhochhibhoya et al. (2022) | 40 | Longitudinal | Mental attitudes |
| Viola et al. (2013) | 15 | Clinical study | OHRQoL and satisfaction |

**Table A. RoB 2 – Randomized Controlled Trials**

| First Author (Year) | Randomization | Deviations | Missing Data | Measurement | Reporting | Overall RoB 2 |
| --- | --- | --- | --- | --- | --- | --- |
| Heydecke G (2003) | Low | Low | Low | Low | Low | Low |

**Table B. ROBINS-I – Non-Randomized Interventional Studies**

| First Author (Year) | Confounding | Classification | Selection | Deviations | Missing Data | Measurement | Reporting | Overall ROBINS-I |
| --- | --- | --- | --- | --- | --- | --- | --- | --- |
| Bansod A (2024) | Serious | Low | Moderate | Low | Moderate | Low | Unclear | Serious |
| Thalib B (2017) | Serious | Low | Moderate | Low | Unclear | Low | Unclear | Serious |
| Goiato MC (2019) | Serious | Low | Moderate | Low | Low | Low | Low | Serious |
| John MT(2004) | Moderate | Low | Moderate | Low | Moderate | Low | Low | Moderate |
| Adam RZ (2007) | Serious | Low | Serious | Low | Moderate | Low | Low | Serious |
| Ellis JS(2007) | Serious | Low | Moderate | Low | Low | Low | Low | Serious |
| Stober T (2012) | Serious | Low | Moderate | Low | Low | Low | Low | Serious |
| Viola AP (2013) | Serious | Low | Moderate | Low | Low | Low | Low | Serious |
| Shigli (2010) | Serious | Low | Moderate | Low | Moderate | Low | Low | Serious |
| Pisani (2012) | Serious | Low | Moderate | Low | Low | Low | Low | Serious |

**Table C. Newcastle–Ottawa Scale – Observational Studies**

| First Author (Year) | Selection (0–4) | Comparability (0–2) | Outcome (0–3) | Total (0–9) | Judgment |
| --- | --- | --- | --- | --- | --- |
| McNaugher (2001) | 2 | 1 | 2 | 5 | Moderate |
| Dirik G (2006) | 2 | 1 | 2 | 5 | Moderate |
| John MT (2007) | 2 | 1 | 2 | 5 | Moderate |
| Chamberlain (1985) | 2 | 1 | 2 | 5 | Moderate |
| Vervoorn (1989) | 3 | 1 | 2 | 6 | Moderate |
| Satishkumar (2021) | 3 | 1 | 3 | 7 | High |
| Sendi (2018) | 2 | 1 | 2 | 5 | Moderate |
| Singh (2015) | 2 | 1 | 2 | 5 | Moderate |
| Pasad (2021) | 2 | 1 | 2 | 5 | Moderate |
| Shrivastava (2012) | 2 | 1 | 2 | 5 | Moderate |
| Weyant (2004) | 3 | 1 | 2 | 6 | Moderate |
| Hatim (2008) | 2 | 0 | 2 | 4 | Low |
| Kuo (2009) | 3 | 2 | 2 | 7 | High |
| Inoue (2011) | 2 | 1 | 2 | 5 | Moderate |
| Sekundo (2021) | 3 | 1 | 2 | 6 | Moderate |
| Banerjee (2018) | 3 | 1 | 3 | 7 | High |
| Alves AC (2018) | 3 | 1 | 2 | 6 | Moderate |
| Bhochhibhoya (2022) | 2 | 1 | 2 | 5 | Moderate |
| Heydecke G (2004) | 3 | 1 | 2 | 6 | Moderate |
| Dirik, G (2006) | 2 | 1 | 2 | 5 | Moderate |
